# Supplementary material
Source: PubMed Central journal article supplement (PMC8864504)
Supplement: jama-e221025-s002.pdf [file jama-e221025-s002.pdf]

## Supplementary Online Content

Belohlavek J, Smalcova J, Rob D, et al; . Effect of intra-arrest transport, extracorporeal cardiopulmonary resuscitation, and immediate invasive assessment and treatment on functional neurologic outcome in refractory out-of-hospital cardiac arrest: a randomized clinical trial. *JAMA*. doi:10.1001/jama.2022.1025

**eTable 1.** Study inclusion and Exclusion Criteria in a Study of Intra-arrest Transport, Extracorporeal Cardiopulmonary Resuscitation, and Immediate Invasive Assessment and Treatment in Refractory Out-of-Hospital Cardiac Arrest

**eFigure 1.** Stopping Rule in a Study of Intra-arrest Transport, Extracorporeal Cardiopulmonary Resuscitation, and Immediate Invasive Assessment and Treatment in Refractory Out-of-Hospital Cardiac Arrest

**eFigure 2.** Allocation and Resuscitation Outcomes Flow Chart in a Study of Intra-arrest Transport, Extracorporeal Cardiopulmonary Resuscitation, and Immediate Invasive Assessment and Treatment in Refractory Out-of-Hospital Cardiac Arrest

**eFigure 3.** Kaplan-Meier Survival Analysis in a Study of Intra-arrest Transport, Extracorporeal Cardiopulmonary Resuscitation, and Immediate Invasive Assessment and Treatment in Refractory Out-of-Hospital Cardiac Arrest

**eFigure 4.** Favorable Neurological Outcome After 180 Days in Time of CPR Subgroups in a Study of Intra-arrest Transport, Extracorporeal Cardiopulmonary Resuscitation, and Immediate Invasive Assessment and Treatment in Refractory Out-of-Hospital Cardiac Arrest

**eTable 2.** Causes of Target Temperature Management Exclusion in a Study of Intra-arrest Transport, Extracorporeal Cardiopulmonary Resuscitation, and Immediate Invasive Assessment and Treatment in Refractory Out-of-Hospital Cardiac Arrest

**eTable 3.** Organ Lacerations in a Study of Intra-arrest Transport, Extracorporeal Cardiopulmonary Resuscitation, and Immediate Invasive Assessment and Treatment in Refractory Out-of-Hospital Cardiac Arrest

**eTable 4.** Technical Complications in a Study of Intra-arrest Transport, Extracorporeal Cardiopulmonary Resuscitation, and Immediate Invasive Assessment and Treatment in Refractory Out-of-Hospital Cardiac Arrest

**eTable 5.** Summary of all Protocol Deviations in a Study of Intra-arrest Transport, Extracorporeal Cardiopulmonary Resuscitation, and Immediate Invasive Assessment and Treatment in Refractory Out-of-Hospital Cardiac Arrest

This supplementary material has been provided by the authors to give readers additional information about their work.

**eTable 1. Study inclusion and exclusion criteria<sup>18</sup> in a Study of Intra-arrest Transport, Extracorporeal Cardiopulmonary Resuscitation, and Immediate Invasive Assessment and Treatment in Refractory Out-of-Hospital Cardiac Arrest**

**Panel A.** Entry criteria for enrollment into the study.

| <b>Inclusion criteria</b>                                                                                                                             | <b>Exclusion criteria</b>                                                                                                       |
|-------------------------------------------------------------------------------------------------------------------------------------------------------|---------------------------------------------------------------------------------------------------------------------------------|
| Age $\geq 18$ and $\leq 65$ years                                                                                                                     | Out of hospital cardiac arrest of presumed non-cardiac cause                                                                    |
| Witnessed out of hospital cardiac arrest of presumed cardiac cause                                                                                    | Unwitnessed collapse                                                                                                            |
| Minimum of 5 minutes of advanced cardiac life support performed by emergency medical service team without sustained return of spontaneous circulation | Suspected or confirmed pregnancy                                                                                                |
| Unconsciousness (Glasgow Coma Score $< 8$ )                                                                                                           | Return of spontaneous circulation within 5 minutes of advanced cardiac life support performed by emergency medical service team |
| Extracorporeal life support team and intensive care unit bed capacity in cardiac center available                                                     | Conscious patient                                                                                                               |
|                                                                                                                                                       | Known bleeding diathesis or suspected or confirmed acute or recent intracranial bleeding                                        |
|                                                                                                                                                       | Suspected or confirmed acute stroke                                                                                             |
|                                                                                                                                                       | Known severe chronic organ dysfunction or other limitations in therapy                                                          |
|                                                                                                                                                       | “Do not resuscitate” order or other circumstances making 180 day survival unlikely                                              |
|                                                                                                                                                       | Known pre-arrest cerebral performance category $\geq 3$                                                                         |

**Panel B.** Criteria for initiation of extracorporeal life support (ECLS).

*Footnote:* \*if collapse time was not exactly known, initial call to emergency medical service was considered

*Abbreviations:* ACLS: advanced cardiac life support; CPC: cerebral performance category; ECLS: extracorporeal life support; ICU: intensive care unit; OHCA: out-of hospital cardiac arrest; ROSC: return of spontaneous circulation; EMS: emergency medical service.

| <b>Inclusion criteria</b>                                                                                                                                                                                             | <b>Exclusion criteria</b>                                               |
|-----------------------------------------------------------------------------------------------------------------------------------------------------------------------------------------------------------------------|-------------------------------------------------------------------------|
| No return of spontaneous circulation or return of spontaneous circulation with ongoing shock (defined as sustained hypotension below 90 mmHg of systolic pressure or need for moderate to high doses of vasopressors) | Signs of death or irreversible organ damage                             |
| Admission to cathlab not later than 60 minutes after the collapse/initial call to emergency medical service*                                                                                                          | Known bleeding diathesis                                                |
| Consensus of cardiac center team members on extracorporeal life support initiation                                                                                                                                    | Inadequate arterial and/or venous access for femoro-femoral cannulation |

**eFigure 1. Stopping rule in a Study of Intra-arrest Transport, Extracorporeal Cardiopulmonary Resuscitation, and Immediate Invasive Assessment and Treatment in Refractory Out-of-Hospital Cardiac Arrest**

*Footnote:* Graphical delineation for scenario 2, estimated 15% increase of primary outcome in invasive (25%) vs. standard (10%) groups.

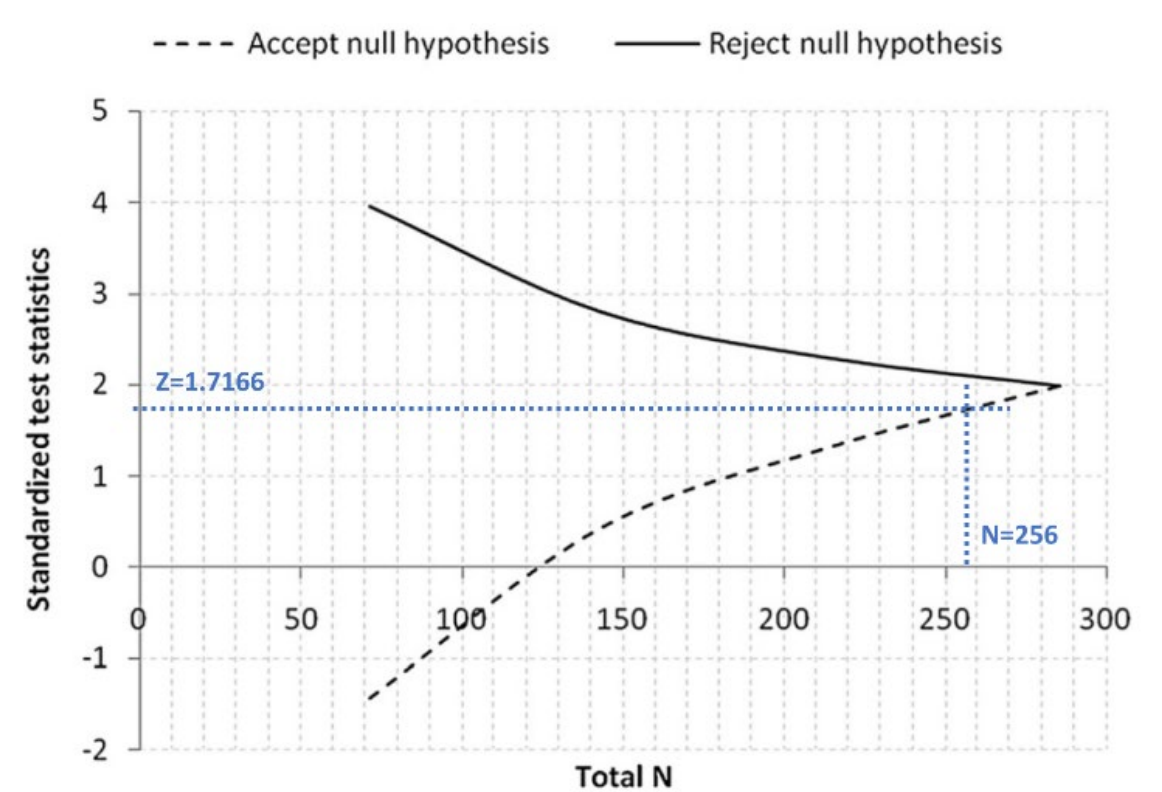

**eFigure 2. Allocation and resuscitation outcomes flow chart in a Study of Intra-arrest Transport, Extracorporeal Cardiopulmonary Resuscitation, and Immediate Invasive Assessment and Treatment in Refractory Out-of-Hospital Cardiac Arrest**

*Footnotes:* \*Declared dead pre hosp – declared dead prehospitally or on admission. \*\*Died within 1 hour – pronounced dead within one hour after admission. Three patients allocated to invasive group and implanted with ECLS died within 1 hour after admission, therefore number of ECLS patients 79.

*Abbreviations:* CPC: cerebral performance category; ECLS: extracorporeal life support; ICU: intensive care unit; OHCA: out-of hospital cardiac arrest; ROSC: return of spontaneous circulation; EMS: emergency medical service.

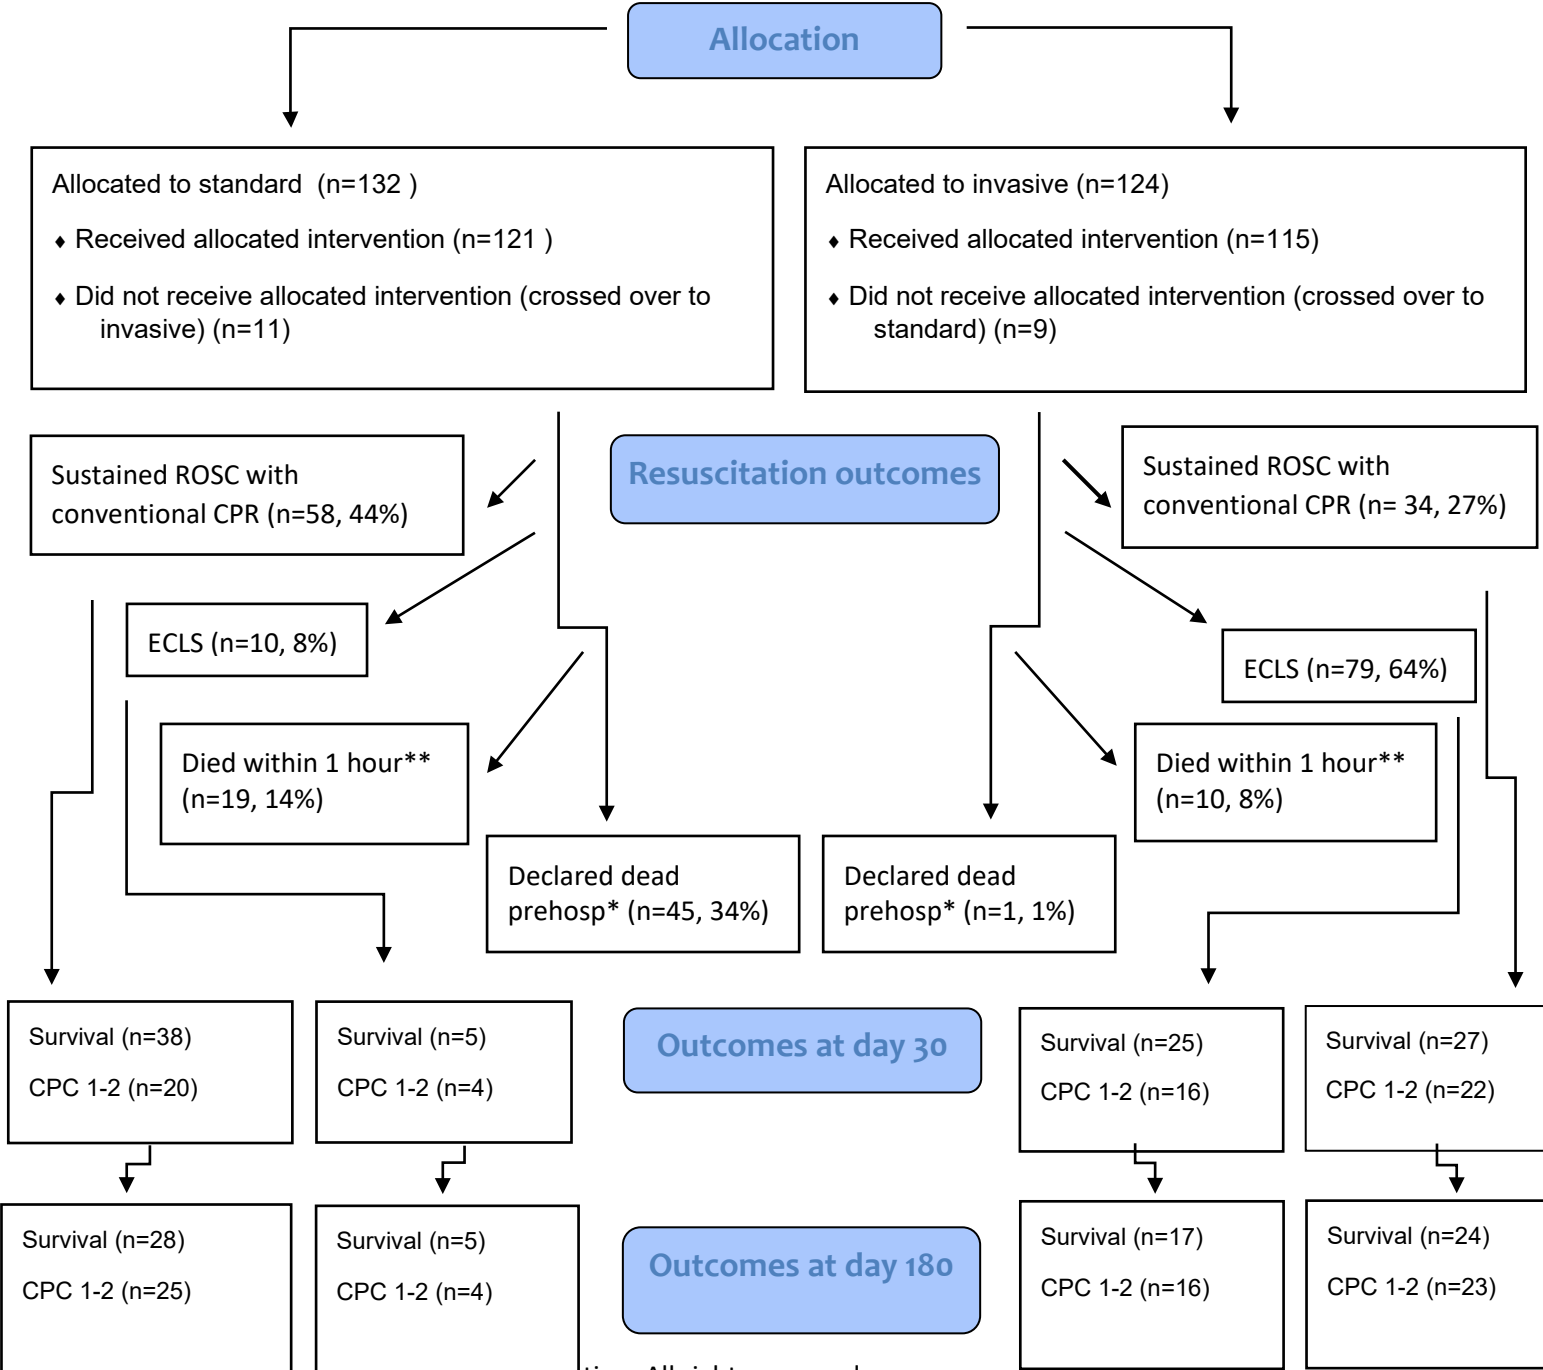

**eFigure 3. Kaplan-Meier survival analysis in a Study of Intra-arrest Transport, Extracorporeal Cardiopulmonary Resuscitation, and Immediate Invasive Assessment and Treatment in Refractory Out-of-Hospital Cardiac Arrest**

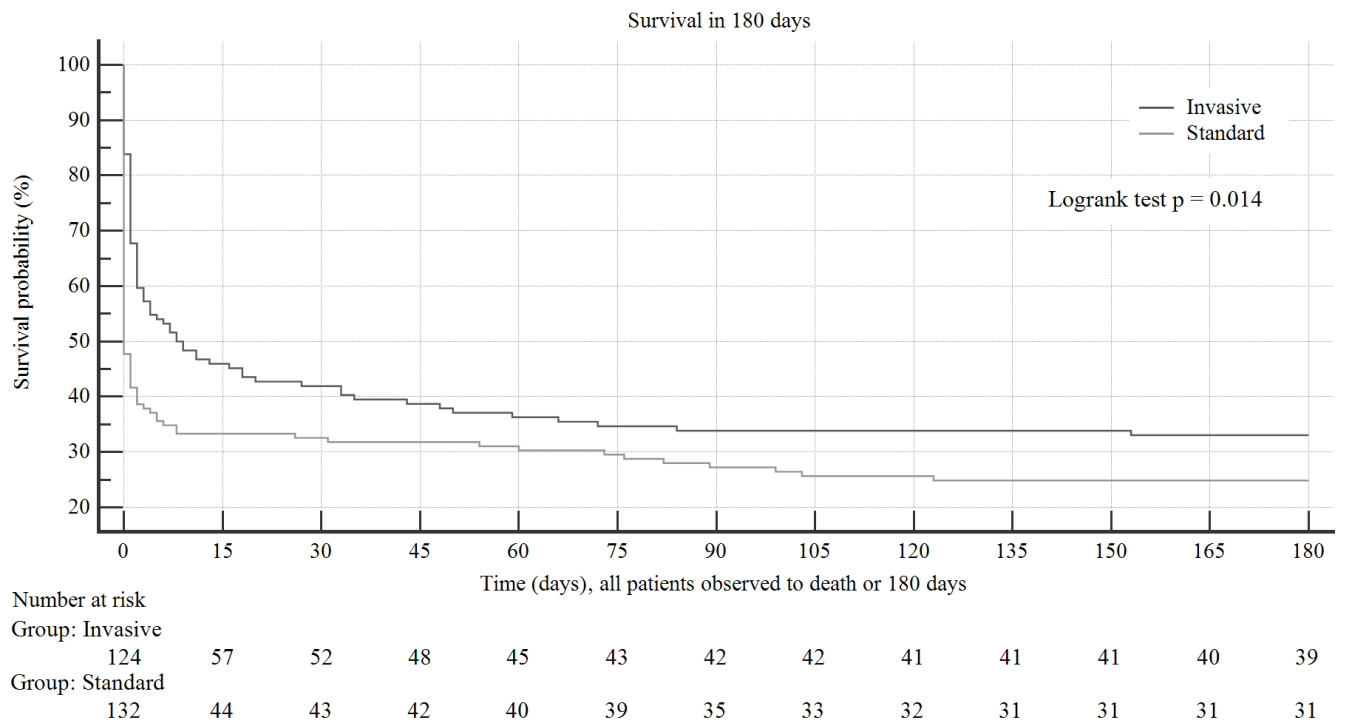

**eFigure 4. Favorable neurological outcome after 180 days in time of CPR subgroups in a Study of Intra-arrest Transport, Extracorporeal Cardiopulmonary Resuscitation, and Immediate Invasive Assessment and Treatment in Refractory Out-of-Hospital Cardiac Arrest**

*Footnote:* Numbers above the bars represent number of patients in respective groups. Six patients surviving with a favorable neurological outcome in  $\geq 45$  mins standard group include 4 patients crossed over from standard to invasive group.

*Abbreviations:* CPC: cerebral performance category; CPR: cardiopulmonary resuscitation.

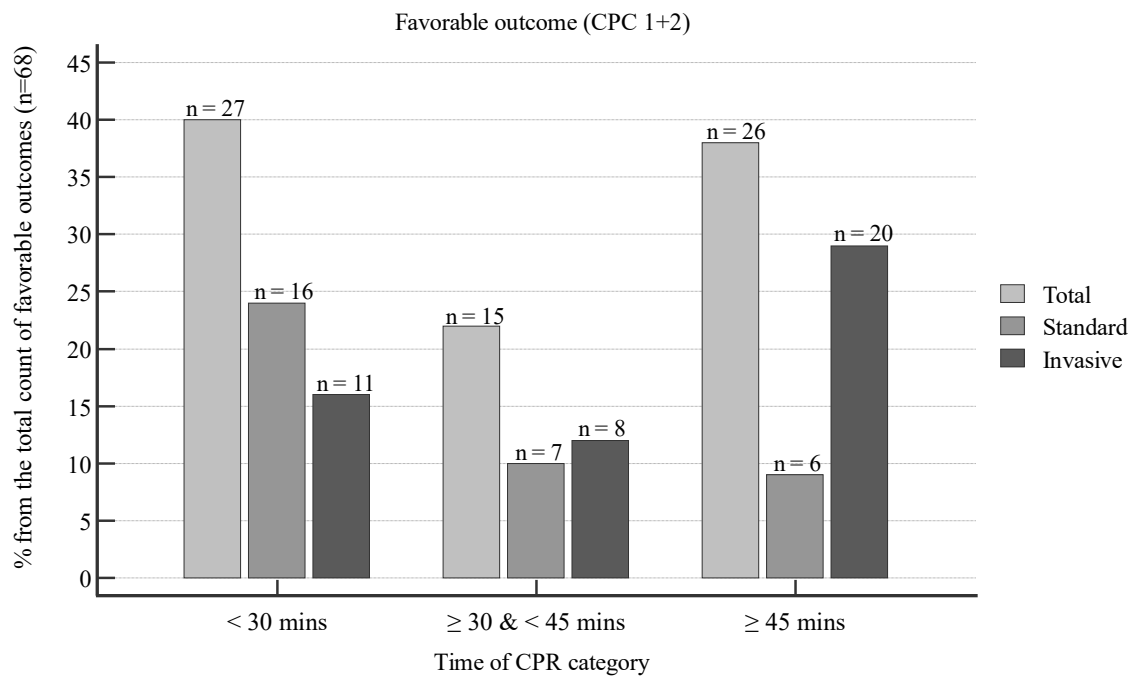

**eTable 2. Causes of target temperature management exclusion in a Study of Intra-arrest Transport, Extracorporeal Cardiopulmonary Resuscitation, and Immediate Invasive Assessment and Treatment in Refractory Out-of-Hospital Cardiac Arrest**

| <b>Patient number</b> | <b>Cause of target temperature management exclusion</b>       |
|-----------------------|---------------------------------------------------------------|
| 4                     | early death, instability, time to death since admission 26min |
| 15                    | early death, instability, time to death since admission 17min |
| 24                    | bleeding                                                      |
| 31                    | instability, time to death since admission 6h 49min           |
| 40                    | early death, instability, time to death since admission 62min |
| 57                    | early death, instability, time to death since admission 50min |
| 98                    | instability, time to death since admission 3h 9min            |
| 104                   | early death, instability, time to death since admission 15min |
| 110                   | early death, instability, time to death since admission 18min |
| 123                   | early death, instability, time to death since admission 17min |
| 125                   | early death, instability, time to death since admission 65min |
| 129                   | bleeding                                                      |
| 132                   | early death, instability, time to death since admission 22min |
| 133                   | early death, instability, time to death since admission 20min |
| 138                   | early death, instability, time to death since admission 47min |
| 141                   | early death, instability, time to death since admission 32min |
| 146                   | early death, instability, time to death since admission 18min |
| 152                   | instability, time to death since admission 5h 39min           |
| 157                   | early death, instability, time to death since admission 33min |
| 160                   | bleeding                                                      |
| 169                   | early death, instability, time to death since admission 40min |
| 179                   | early death, instability, time to death since admission 17min |
| 180                   | early death, instability, time to death since admission 1min  |
| 193                   | early death, instability, time to death since admission 51min |
| 209                   | early death, instability, time to death since admission 22min |
| 222                   | early death, instability, time to death since admission 36min |
| 227                   | bleeding                                                      |
| 236                   | early death, instability, time to death since admission 26min |
| 237                   | early death, instability, time to death since admission 30min |
| 248                   | early death, instability, time to death since admission 64min |
| 255                   | early death, instability, time to death since admission 23min |
| 261                   | early death, instability, time to death since admission 28min |



**eTable 3. Organ lacerations in a Study of Intra-arrest Transport, Extracorporeal Cardiopulmonary Resuscitation, and Immediate Invasive Assessment and Treatment in Refractory Out-of-Hospital Cardiac Arrest**

|                       |                                                                 |
|-----------------------|-----------------------------------------------------------------|
| <b>Pt. Number 90</b>  | right lung perforation by broken ribs, ipsilateral hemothorax   |
| <b>Pt. Number 94</b>  | right atrium tear by sharp piece of broken rib, hemopericardium |
| <b>Pt. Number 106</b> | liver tear, hemoperitoneum                                      |
| <b>Pt. Number 139</b> | liver tear, omental bleed                                       |
| <b>Pt. Number 155</b> | liver tear, hemoperitoneum                                      |
| <b>Pt. Number 160</b> | liver tear, hemoperitoneum                                      |
| <b>Pt. Number 248</b> | liver tear, hemoperitoneum                                      |

**eTable 4. Technical complications in a Study of Intra-arrest Transport, Extracorporeal Cardiopulmonary Resuscitation, and Immediate Invasive Assessment and Treatment in Refractory Out-of-Hospital Cardiac Arrest**

|                                                            |                                                                                                                                                                                                                       |
|------------------------------------------------------------|-----------------------------------------------------------------------------------------------------------------------------------------------------------------------------------------------------------------------|
| <p><b>Pt. Number: 99</b> – oxygenator failure</p>          | <p>A patient on inotropic and vasopressor therapy, an episode of hypotension and hypoxia for less than 5 mins observed, attributed to oxygenator failure, corrected by perfusionist intervention.</p>                 |
| <p><b>Pt. Number 148</b> – cathlab angiography failure</p> | <p>Patient admitted to the cathlab, uncomplicated ECMO cannulation, later angiography device failure, change of the cathlab room needed, 15 mins delay in coronary angiography which revealed nonsignificant CAD.</p> |
| <p><b>Pt. Number 240</b> – ventilator failure</p>          | <p>During coronary angiography suddenly hypoxia attributed to ventilator failure, switched to bag ventilation, changed ventilator.</p>                                                                                |

**eTable 5. Summary of all protocol deviations in a Study of Intra-arrest Transport, Extracorporeal Cardiopulmonary Resuscitation, and Immediate Invasive Assessment and Treatment in Refractory Out-of-Hospital Cardiac Arrest**

*Footnotes:*

**Age:** 63 enrolled patients were older than 65 years due to a poor estimate during the initial resuscitation on the scene. All patients remained in the analysis, this fact became obvious later on during the admission to hospital.

**Other institution referral:** Three patients were transported to other institution based on a decision of treating emergency physician. All patients remained in the analysis and the data were retrieved.

**Crossovers:** Crossovers were allowed both from standard to invasive arm and from invasive to standard arm, see the methods section. Overall, 20 patients were crossed, 11 from standard to invasive and 9 from invasive to standard arm.

**Transport to hospital in standard arm despite no return of spontaneous circulation (ROSC):** In standard arm, 15 patients have been transported to hospital by emergency crews without sustained ROSC and without approval for crossover to invasive arm. After admission, standard advanced cardiac life support was continued according to guidelines.

**ECLS time:** In invasive arm, 11 patients were implanted with ECLS despite the fact of being admitted to hospital after 60 mins of cardiac arrest. All patients remained in the analysis.

**Witnessed arrest:** All cardiac arrest cases enrolled in the study were witnessed with the exception of 4 patients, see below, all patients remained in the analysis, because this fact became obvious later on during the admission to hospital.

**No target temperature management (TTM):** No TTM was provided in 32 patients due to below reasons, see supplementary table 2.

**Normothermia in the invasive arm:** In 57 patients in invasive arm, normothermia of 36°C was used instead of hypothermia and this was allowed after the publication of TTM trial.<sup>19</sup> This occurred in early awaking patients or in patients with complications of hypothermia.

*Eplanation for the table abbreviations:* **age:** age over 65 years; **other institution:** transported to other cardiac center, a decision of a treating emergency physician; **cross:** crossovers in both arms; **noROSC transport in S arm:** patients being transported to hospital without sustained return of spontaneous circulation and without approval for a crossover; **noTTM:** all admitted to hospital not receiving target temperature management; **ecmo-time:** patients in invasive arm who received ECMO despite being admitted after 60 mins of cardiac arrest; **NW:** not witnessed cardiac arrest; **normo-i:** normothermia in invasive arm.

| <b>OHCA study</b>     | <b>Protocol deviations</b> |                                   |              |                |                  |           |
|-----------------------|----------------------------|-----------------------------------|--------------|----------------|------------------|-----------|
| <b>Patient number</b> | <b>Age criteria</b>        | <b>Crossover/noROSC transport</b> | <b>noTTM</b> | <b>normo-i</b> | <b>ecmo-time</b> | <b>NW</b> |
| 1                     | age                        |                                   |              |                |                  |           |
| 2                     | age                        |                                   |              |                |                  |           |
| 4                     |                            | cross                             | noTTM        |                |                  |           |
| 5                     | age                        |                                   |              |                |                  |           |
| 10                    |                            | cross                             |              |                |                  |           |
| 12                    |                            | cross                             |              |                |                  |           |
| 13                    |                            | cross                             |              |                |                  |           |
| 15                    | age                        | noROSC transport in S arm         | noTTM        |                |                  |           |
| 16                    |                            |                                   |              | normo-i        |                  |           |
| 17                    | age                        |                                   |              | normo-i        |                  |           |
| 20                    |                            | cross                             |              |                |                  |           |
| 21                    |                            | cross                             |              |                |                  |           |
| 22                    |                            |                                   |              | normo-i        |                  |           |
| 23                    |                            |                                   |              | normo-i        |                  |           |
| 24                    | other institution          |                                   | noTTM        |                |                  |           |
| 26                    |                            | cross                             |              |                |                  |           |
| 27                    |                            |                                   |              | normo-i        |                  |           |
| 28                    |                            |                                   |              |                | ecmo-time        |           |
| 29                    |                            | cross                             |              |                |                  |           |
| 30                    |                            |                                   |              | normo-i        |                  |           |
| 31                    | age                        |                                   | noTTM        |                |                  |           |
| 33                    | age                        |                                   |              | normo-i        | ecmo-time        |           |
| 34                    |                            |                                   |              | normo-i        |                  |           |
| 35                    |                            | cross                             |              |                |                  |           |
| 37                    |                            |                                   |              | normo-i        |                  |           |
| 38                    |                            |                                   |              | normo-i        |                  |           |
| 40                    | other institution          | noROSC transport in S arm         | noTTM        |                |                  | NW        |
| 43                    |                            |                                   |              | normo-i        |                  |           |
| 44                    |                            | cross                             |              |                |                  |           |
| 45                    | age                        |                                   |              | normo-i        |                  |           |
| 46                    |                            | cross                             |              |                |                  |           |
| 47                    |                            |                                   |              | normo-i        |                  |           |
| 48                    |                            |                                   |              | normo-i        |                  |           |
| 52                    |                            | cross                             |              |                |                  |           |
| 53                    | age                        |                                   |              |                |                  |           |
| 54                    |                            | cross                             |              |                |                  |           |
| 56                    | age                        |                                   |              |                |                  |           |
| 57                    |                            | cross                             | noTTM        |                |                  |           |
| 62                    |                            |                                   |              |                | ecmo-time        |           |
| 63                    |                            |                                   |              | normo-i        |                  |           |
| 68                    |                            |                                   |              | normo-i        |                  |           |
| 72                    |                            |                                   |              | normo-i        |                  |           |
| 73                    | age                        | cross                             |              |                |                  |           |
| 76                    | age                        |                                   |              |                |                  |           |
| 77                    |                            |                                   |              | normo-i        | ecmo-time        |           |

|     |                   |                           |       |         |           |  |
|-----|-------------------|---------------------------|-------|---------|-----------|--|
| 78  |                   |                           |       | normo-i |           |  |
| 80  | age               |                           |       |         |           |  |
| 81  | age               |                           |       |         |           |  |
| 89  |                   | cross                     |       |         |           |  |
| 90  | age               |                           |       | normo-i |           |  |
| 93  | age               |                           |       |         |           |  |
| 94  | age               |                           |       |         |           |  |
| 96  |                   |                           |       |         | ecmo-time |  |
| 98  |                   |                           | noTTM |         |           |  |
| 99  | age               |                           |       | normo-i |           |  |
| 100 | age               |                           |       |         |           |  |
| 103 | age               |                           |       | normo-i |           |  |
| 104 |                   | noROSC transport in S arm | noTTM |         |           |  |
| 105 | age               |                           |       |         |           |  |
| 106 |                   |                           |       | normo-i |           |  |
| 107 |                   |                           |       |         | ecmo-time |  |
| 108 |                   |                           |       |         | ecmo-time |  |
| 109 | age               |                           |       |         |           |  |
| 110 |                   |                           | noTTM |         |           |  |
| 114 |                   |                           |       | normo-i |           |  |
| 117 | age               |                           |       |         |           |  |
| 121 | age               |                           |       | normo-i |           |  |
| 122 |                   |                           |       | normo-i |           |  |
| 123 | age               | cross                     | noTTM |         |           |  |
| 124 | age               |                           |       |         |           |  |
| 125 | other institution | noROSC transport in S arm | noTTM |         |           |  |
| 126 | age               |                           |       | normo-i |           |  |
| 127 | age               |                           |       |         |           |  |
| 129 |                   |                           | noTTM |         |           |  |
| 130 | age               |                           |       | normo-i |           |  |
| 132 |                   | noROSC transport in S arm | noTTM |         |           |  |
| 133 |                   | noROSC transport in S arm | noTTM |         |           |  |
| 134 | age               |                           |       |         |           |  |
| 136 | age               |                           |       | normo-i |           |  |
| 138 |                   |                           | noTTM |         |           |  |
| 139 | age               |                           |       | normo-i |           |  |
| 140 | age               |                           |       | normo-i |           |  |
| 141 | age               | noROSC transport in S arm | noTTM |         |           |  |
| 142 |                   |                           |       | normo-i |           |  |
| 143 | age               |                           |       |         |           |  |
| 146 |                   |                           | noTTM |         |           |  |
| 147 | age               |                           |       | normo-i |           |  |
| 148 |                   |                           |       |         | ecmo-time |  |

|     |     |                           |       |         |           |    |
|-----|-----|---------------------------|-------|---------|-----------|----|
| 149 |     |                           |       | normo-i |           |    |
| 151 | age |                           |       |         |           |    |
| 152 |     |                           | noTTM |         |           |    |
| 153 |     |                           |       |         | ecmo-time |    |
| 155 |     |                           |       | normo-i |           |    |
| 156 |     |                           |       | normo-i |           |    |
| 157 |     |                           | noTTM |         |           |    |
| 159 |     |                           |       | normo-i |           |    |
| 160 |     |                           | noTTM |         |           |    |
| 163 |     |                           |       |         |           |    |
| 164 |     | cross                     |       |         |           | NW |
| 165 | age |                           |       |         |           |    |
| 167 | age |                           |       |         |           |    |
| 169 | age |                           | noTTM |         |           |    |
| 171 |     |                           |       | normo-i |           |    |
| 173 | age |                           |       |         |           |    |
| 176 | age |                           |       |         |           |    |
| 178 | age |                           |       |         |           |    |
| 179 |     | noROSC transport in S arm | noTTM |         |           |    |
| 180 | age | noROSC transport in S arm | noTTM |         |           |    |
| 181 |     |                           |       | normo-i |           |    |
| 185 |     |                           |       | normo-i |           |    |
| 186 | age |                           |       |         |           |    |
| 187 | age |                           |       |         |           |    |
| 188 | age |                           |       |         |           |    |
| 190 | age |                           |       |         |           |    |
| 193 |     | noROSC transport in S arm | noTTM |         |           |    |
| 194 | age |                           |       |         |           |    |
| 196 | age |                           |       |         |           |    |
| 197 | age |                           |       |         |           |    |
| 199 |     |                           |       | normo-i |           |    |
| 200 | age |                           |       |         |           |    |
| 201 | age |                           |       |         |           |    |
| 203 |     |                           |       | normo-i |           |    |
| 204 |     |                           |       |         | ecmo-time |    |
| 206 |     |                           |       | normo-i |           |    |
| 208 |     |                           |       | normo-i | ecmo-time |    |
| 209 |     |                           | noTTM |         |           |    |
| 210 | age |                           |       | normo-i |           |    |
| 211 |     |                           |       | normo-i |           |    |
| 213 | age |                           |       |         |           |    |
| 218 | age |                           |       | normo-i |           |    |
| 221 |     |                           |       | normo-i |           |    |

|     |     |                           |       |         |  |    |
|-----|-----|---------------------------|-------|---------|--|----|
| 222 |     | noROSC transport in S arm | noTTM |         |  |    |
| 224 | age |                           |       |         |  |    |
| 225 |     |                           |       | normo-i |  |    |
| 226 |     |                           |       |         |  | NW |
| 227 |     |                           | noTTM |         |  |    |
| 228 |     |                           |       | normo-i |  |    |
| 229 | age |                           |       |         |  |    |
| 230 |     |                           |       | normo-i |  | NW |
| 233 |     |                           |       | normo-i |  |    |
| 236 |     | cross                     | noTTM |         |  |    |
| 237 |     |                           | noTTM |         |  |    |
| 238 | age |                           |       |         |  |    |
| 239 |     |                           |       |         |  |    |
| 240 | age |                           |       |         |  |    |
| 241 |     | noROSC transport in S arm |       |         |  |    |
| 242 |     |                           |       | normo-i |  |    |
| 245 | age |                           |       |         |  |    |
| 248 |     | noROSC transport in S arm | noTTM |         |  |    |
| 251 | age |                           |       |         |  |    |
| 252 |     | cross                     |       |         |  |    |
| 254 |     |                           |       | normo-i |  |    |
| 255 |     | noROSC transport in S arm | noTTM |         |  |    |
| 256 |     |                           |       | normo-i |  |    |
| 257 |     |                           |       | normo-i |  |    |
| 258 |     |                           |       | normo-i |  |    |
| 261 | age | noROSC transport in S arm | noTTM |         |  |    |
