# Supplementary material
Source: PubMed Central journal article supplement (PMC8864504)
Supplement: jama-e221025-s003.pdf [file jama-e221025-s003.pdf]

## DSMB recommendation

### TRIAL PROTOCOL

**Title: Hyperinvasive Approach in Refractory Out-of-Hospital Cardiac Arrest.**

**Prague OHCA study**

PROTOCOL REGISTRATION NUMBER: ClinicalTrials.gov: NCT01511666

#### To whom it may concern:

Based on report from 19-Oct-2020 DSMB recommends to stop the study.

**Rationale:** Sample size reached scenario 2 model in the protocol, statistically significant difference in primary outcome was not met. Other study results report improved 30 days neurological recovery (secondary outcome), 180 days survival, survival in a subgroup of patients resuscitated more than 45 mins – all in favor of hyperinvasive approach. Survival reported in patients crossed over from standard to hyperinvasive arm is 45% (5 of 11).

Prague, Oct 25, 2020

Petr Ošťádal, MD, PhD.

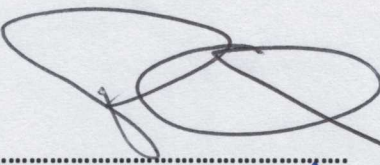

.....

Anatolij Truhlář, MD, PhD.

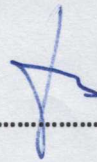

Zdravotnická záchranná služba  
Královéhradeckého kraje  
MUDr. Anatolij Truhlář, Ph.D., FERC  
.....lékařský náměstek  
vedoucí lékař letecké záchranné služby

Richard Rokyta, MD, PhD.



.....

Radek Pudil, MD, DrSc.

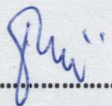

.....
