# Supplementary material
Source: PubMed Central journal article supplement (PMC8864504)
Supplement: jama-e221025-s004.pdf [file jama-e221025-s004.pdf]

\*Indicates required information. Only first name, last name, and suffix will appear in PubMed.

| <b>*Group Name(s): Prague OHCA Study Group</b> |                   |                              |                  |                                                                                                                                                                         |                                          |                                                         |                                                                                            |
|------------------------------------------------|-------------------|------------------------------|------------------|-------------------------------------------------------------------------------------------------------------------------------------------------------------------------|------------------------------------------|---------------------------------------------------------|--------------------------------------------------------------------------------------------|
| <b>*First Name and Middle Initial(s)</b>       | <b>*Last Name</b> | <b>*Suffix (eg, Jr, III)</b> | Academic Degrees | Institution                                                                                                                                                             | Location (city, state/province, country) | Role or Contribution, eg, chair, principal investigator | Group (if more than 1 Group listed in the byline) and/or Subgroup (eg, Steering Committee) |
| Michael                                        | Aschermann        |                              | MD, PhD          | 2 <sup>nd</sup> Department of Medicine – Department of Cardiovascular Medicine, First Faculty of Medicine, Charles University in Prague and General University Hospital | Prague, Czech Republic                   | Collaborator                                            |                                                                                            |
| Štěpán                                         | Jeřábek           |                              | MD               | 2 <sup>nd</sup> Department of Medicine – Department of Cardiovascular Medicine, First Faculty of Medicine, Charles University in Prague and General University Hospital | Prague, Czech Republic                   | Collaborator                                            |                                                                                            |
| Michal                                         | Paďour            |                              | MD               | 2 <sup>nd</sup> Department of Medicine – Department of Cardiovascular Medicine, First Faculty of Medicine, Charles University in Prague and General University Hospital | Prague, Czech Republic                   | Collaborator                                            |                                                                                            |
| Jan                                            | Šimek             |                              | MD               | 2 <sup>nd</sup> Department of Medicine – Department of Cardiovascular Medicine, First Faculty of Medicine, Charles University in Prague and General University Hospital | Prague, Czech Republic                   | Collaborator                                            |                                                                                            |
| Michal                                         | Otáhal            |                              | MD, PhD          | Department of Anesthesiology, Resuscitation and Intensive Medicine, First Faculty of Medicine, Charles University in Prague and General University Hospital             | Prague, Czech Republic                   | Collaborator                                            |                                                                                            |
| Marek                                          | Flaksa            |                              | MD               | Department of Anesthesiology, Resuscitation and Intensive Medicine, First Faculty of Medicine, Charles University in Prague and General University Hospital             | Prague, Czech Republic                   | Collaborator                                            |                                                                                            |
| Ilona                                          | Lálová            |                              | RN               | 2 <sup>nd</sup> Department of Medicine – Department of Cardiovascular Medicine, First Faculty of Medicine, Charles University in Prague and General University Hospital | Prague, Czech Republic                   | Collaborator                                            |                                                                                            |
| Markéta                                        | Hubatová          |                              | RN               | 2 <sup>nd</sup> Department of Medicine – Department of Cardiovascular Medicine, First Faculty of Medicine, Charles University in Prague and General University Hospital | Prague, Czech Republic                   | Collaborator                                            |                                                                                            |
| Michal                                         | Požizka           |                              | MD, PhD          | Department of Anesthesiology, Resuscitation and Intensive Medicine, First Faculty of Medicine, Charles University in Prague and General University Hospital             | Prague, Czech Republic                   | Collaborator                                            |                                                                                            |
| Hana                                           | Skalická          |                              | MD, PhD          | 2 <sup>nd</sup> Department of Medicine – Department of Cardiovascular Medicine, First Faculty of Medicine, Charles University in Prague and General University Hospital | Prague, Czech Republic                   | Collaborator                                            |                                                                                            |
