# Supplementary material
Source: PubMed Central journal article supplement (PMC8864504)
Supplement: jama-e221025-s005.pdf [file jama-e221025-s005.pdf]

## Data Sharing Statement

Belohlavek J, Smalcova J, Rob D, et al; . Effect of intra-arrest transport, extracorporeal cardiopulmonary resuscitation, and immediate invasive assessment and treatment on functional neurologic outcome in refractory out-of-hospital cardiac arrest: a randomized clinical trial. JAMA. doi:10.1001/jama.2022.1025

### Data Sharing Statement

#### Data

**Data available:** Yes

**Data types:** Deidentified participant data

**How to access data:** [jan.belohlavek@vfn.cz](mailto:jan.belohlavek@vfn.cz)

**When available:** beginning date: 08-01-2022

#### Supporting Documents

**Document types:** Informed consent form

**How to access documents:** [jan.belohlavek@vfn.cz](mailto:jan.belohlavek@vfn.cz)

**When available:** beginning date: 08-01-2022

#### Additional Information

**Who can access the data:** Researchers who provide a methodologically sound proposal.

**Types of analyses:** To achieve aims in the approved proposal.

**Mechanisms of data availability:** After approval of a proposal.
